# Supplementary material for: Tolerogenic Lipid Nanoparticles for Delivering Self-Antigen mRNA for the Treatment of Experimental Autoimmune Encephalomyelitis
Source: MDPI journal article supplement (doi:10.3390/ph16091270), 2023-09-07
Supplement: s1 [file s1]

## **Supporting Information**

### **Tolerogenic Lipid Nanoparticles for Delivering Self-antigen mRNA for the Treatment of Experimental Autoimmune Encephalomyelitis**

Masaki Gomi <sup>1,2</sup>, Yuka Nakayama <sup>2</sup>, Yu Sakurai <sup>2</sup>, Ryotaro Oyama <sup>1,2</sup>, Koki Iwasaki <sup>1</sup>, Mizuki Doi <sup>1,2</sup>, Yi Liu <sup>1,2</sup>, Mizuho Hori <sup>2</sup>, Himeka Watanabe <sup>2</sup>, Kohei Hashimoto <sup>2</sup>, Hiroki Tanaka <sup>1</sup>, Kota Tange <sup>3</sup>, Yuta Nakai <sup>3</sup>, and Hidetaka Akita <sup>2,\*</sup>

1. Laboratory of DDS Design and Drug Disposition, Graduate School of Pharmaceutical Sciences, Chiba University, 1-8-1, Inohana, Chuo-ku, Chiba, Chiba, 260-0856 Japan
2. Laboratory of DDS Design and Drug Disposition, Graduate School of Pharmaceutical Sciences, Tohoku University, 6-3, Aoba, Aramaki, Aoba-ku, Sendai, Miyagi, 980-8578 Japan
3. Life Science Research Laboratory, NOF CORPORATION, 3-3, Chidoricho, Kawasaki-ku, Kawasaki, Kanagawa, 210-0865 Japan

\* Corresponding author: [hidetaka.akita.a4@tohoku.ac.jp](mailto:hidetaka.akita.a4@tohoku.ac.jp)

## Supplementary experimental section

### *In vivo* imaging of LNP biodistribution and functional mRNA delivery

DiR (0.2 mol%)-labeled LNPs loaded with luciferase mRNA were intravenously injected into mice via the tail vein (1 µg mRNA / 200 µL PBS). The mice were intraperitoneally injected with 3 mg of luciferin potassium in 200 µL PBS at 6 h after the LNP injection. At 5 min after the luciferin injection, the mice were euthanized, and the spleens and livers were harvested. The biodistribution of the LNPs and luciferase activity were then evaluated by IVIS Lumina II (PerkinElmer, Waltham, MA, USA).

### Template DNA sequences for Luc mRNA

GTCCCGCAGTCGGCGTCCAGCGGCTCTGCTTGTTCTGTGTGTGTGTCGTTGCAGGCCTT  
ATTCAAGCTTGAGGATGGAAGATGCCAAGAACATCAAGAAGGGCCCTGCTCCATTC  
TACCCTCTGGAAGATGGAACAGCCGGCGAGCAGCTGCACAAGGCCATGAAGAGATA  
CGCTCTGGTGCCCGGCACAATCGCCTTCACAGATGCTCACATCGAGGTGGACATCAC  
CTACGCCGAGTACTTCGAGATGTCTGTGCGGCTGGCCGAAGCTATGAAGCGCTACGG  
CCTGAACACCAACCACAGAATCGTCGTGTGCAGCGAGAACAGCCTGCAGTTCTTCAT  
GCCTGTGCTGGGCGCTCTGTTCATCGGAGTGGCTGTGGCTCCTGCCAACGACATCTA  
CAACGAGCGCGAGCTGCTGAACAGCATGGGCATCTCTCAGCCCACCGTGGTGTTCGT  
GTCCAAGAAGGGACTGCAGAAAATCCTGAACGTGCAGAGAAGCTGCCCATCATCC  
AGAAAATCATCATCATGGACAGCAAGACCGACTACCAGGGCTTCCAGAGCATGTAC  
ACCTTCGTGACCAGCCATCTGCCACCTGGCTTCAACGAGTACGACTTCGTGCCCAG  
AGCTTCGACAGAGACAAGACAATCGCCCTGATCATGAACAGCAGCGGCTCTACCGG  
ACTGCCCAAAGGTGTTGCTCTGCCTCACAGAACCGCCTGCGTCAGATTCAGCCACGC  
CAGAGATCCCATCTTCGGCAACCAGATCATCCCCGACACAGCCATCCTGAGCGTGGT  
GCCTTTTACACACGGCTTCGGCATGTTACACACTGGGCTACCTGATCTGCGGCTTC  
AGAGTGGTGCTGATGTACCGCTTCGAGGAAGAACTGTTCTGAGAAGCCTGCAGGA  
CTACAAGATCCAGTCTGCCCTGCTGGTGCCTACTCTGTTTCAGCTTCTTTGCCAAGAGC  
ACCCTGATCGATAAGTACGACCTGAGCAACCTGCACGAGATCGCTAGTGGCGGAGC  
CCCTCTGTCTAAAGAAGTGGGCGAAGCCGTCGCCAAGAGGTTCCATCTGCCTGGCAT  
CAGACAAGGCTACGGACTGACCGAGACAACCAGCGCTATCCTGATCACACCTGAGG

GCGACGATAAGCCTGGCGCTGTGGGAAAAGTGGTGCCATTCTTCGAGGCCAAGGTG  
GTGGACCTGGACACCGGAAAAACACTGGGCGTTAACCAGAGGGGGCGAGCTGTGTGT  
CAGAGGCCCTATGATCATGAGCGGCTACGTGAACAACCCCGAGGCCACCAACGCTC  
TGATCGACAAGGATGGATGGCTGCACAGCGGCGACATTGCCTACTGGGACGAAGAT  
GAGCACTTCTTCATCGTGGACAGACTGAAGTCCCTGATCAAGTACAAGGGCTACCAG  
GTGGCCCCCTGCCGAGCTGGAATCTATCCTGCTCCAGCATCCTAACATCTTCGATGCC  
GGCGTGGCAGGACTGCCTGACGATGATGCTGGCGAACTGCCTGCTGCTGTGGTGGTG  
CTGGAACACGGCAAGACCATGACCGAGAAAGAAATCGTGGACTACGTGGCCAGCCA  
AGTGACCACCGCCAAGAACTGAGAGGCGGCGTGGTGTTTGTGGACGAGGTGCCAA  
AAGGCCTGACCGGCAAGCTGGACGCCAGAAAGATCAGAGAGATCCTCATCAAGGCC  
AAGAAAGGCGGCAAGATCGCCGTGTAGGACTAGTGCATCACATTTAAAAGCATCTC  
AGCCTACCATGAGAATAAGAGAAAGAAAATGAAGATCAATAGCTTATTCATCTCTTT  
TTCTTTTTTCGTTGGTGTAAAGCCAACACCCTGTCTAAAAAACATAAATTTCTTTAATC  
ATTTTGCCTCTTTTCTCTGTGCTTCAATTAATAAAAAATGGAAAGAACCTAGATCT

5'-UTR: 1-72

ORF (whole luciferase): 73-1725

3'-UTR: 1726-1925

#### **Template DNA sequences for MOG<sub>27-63</sub>-mRNA**

GTCCCGCAGTCGGCGTCCAGCGGCTCTGCTTGTTTCGTGTGTGTGTCGTTGCAGGCCTT  
ATTCAAGCTTGAGGATGCTGGTCATGGCGCCCCGAACCGTCCTCCTGCTGCTCTCGG  
CGGCCCTGGCCCTGACCGAGACCTGGGCCGGCTCCTCTCCTGGGAAAAATGCCACG  
GGCATGGAGGTGGGTTGGTACCGTTCTCCCTTCTCAAGAGTGGTTCACCTCTACCGA  
AATGGCAAGGACCAAGATGCAGAGCAAGCACCTATCGTGGGCATTGTTGCTGGCCT  
GGCTGTCCTAGCAGTTGTGGTCATCGGAGCTGTGGTCGCTGCTGTGATGTGTAGGAG  
GAAGAGTTCAGGTGGAAAAGGAGGGAGCTACTCTCAGGCTGCGTGCAGCGACAGTG  
CCCAGGGCTCTGATGTGTCTCTCACAGCTTGAGACTAGTGCATCACATTTAAAAGCA  
TCTCAGCCTACCATGAGAATAAGAGAAAGAAAATGAAGATCAATAGCTTATTCATC  
TCTTTTTCTTTTTTCGTTGGTGTAAAGCCAACACCCTGTCTAAAAAACATAAATTTCTT

TAATCATTTTGCCTCTTTTCTCTGTGCTTCAATTAATAAAAAATGGAAAGAACCTAGATCT

5'-UTR: 1-72

Signal peptide derived from HLA-B<sup>41</sup>) : 73-150

ORF (MOG<sub>27-63</sub>): 151-261

Signal peptide derived from MHC class I trafficking signal<sup>41</sup>): 262-429

3'-UTR: 430-629

41) Krotova K *et al.*, *Mol Ther Oncolytics.*, 15, 166-177 (2019).

(a) DiR-fluorescence (Accumulation)

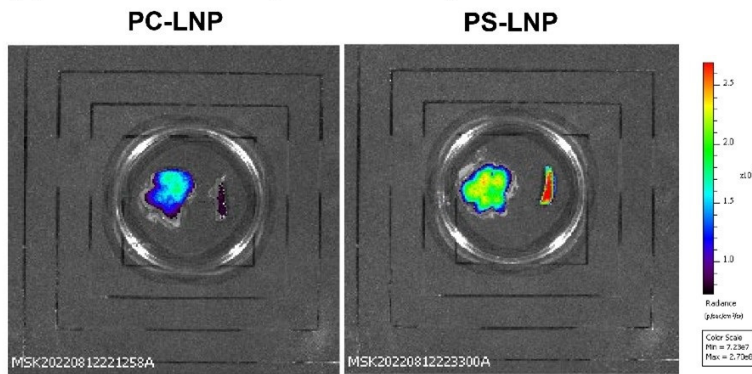

(b) Spleen

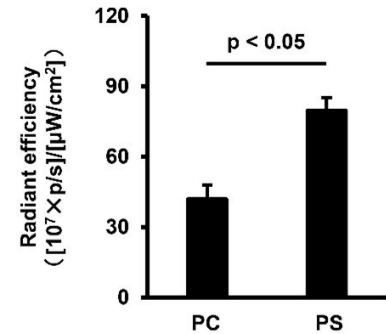

(c) Luc-luminescence (mRNA delivery)

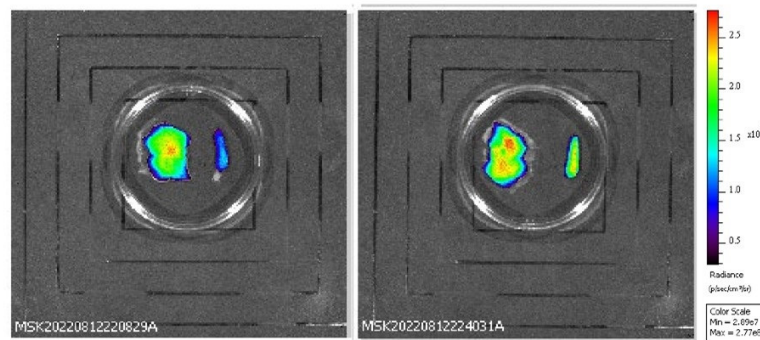

(d) Spleen

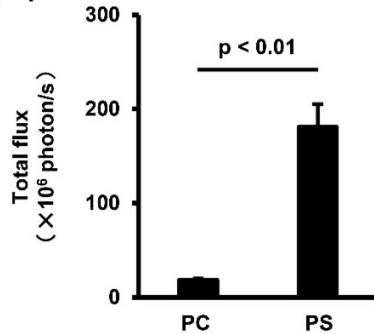

(e) Liver

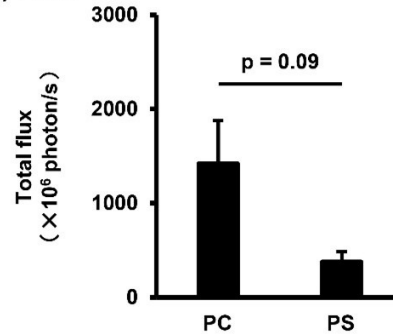

**Figure S1.** Biodistribution and mRNA delivery of intravenously injected LNPs. The LNPs were fluorescently labeled and loaded with luciferase mRNA. (a) The representative images of PC- and PS-LNP accumulation in the spleen and the liver. (b) Accumulation of LNPs in the spleen was evaluated through fluorescent intensity from Supplemental Figure-S1a. (c) The representative images of Luc expression by PC-LNP and PS-LNP administration. (d) mRNA delivery to the spleen was evaluated through luciferase expression from Supplemental Figure-S1c. (e) mRNA delivery to the liver was evaluated. Data represent the mean with S.E (n = 3). Student's t-test was performed between PC- and PS-LNP.

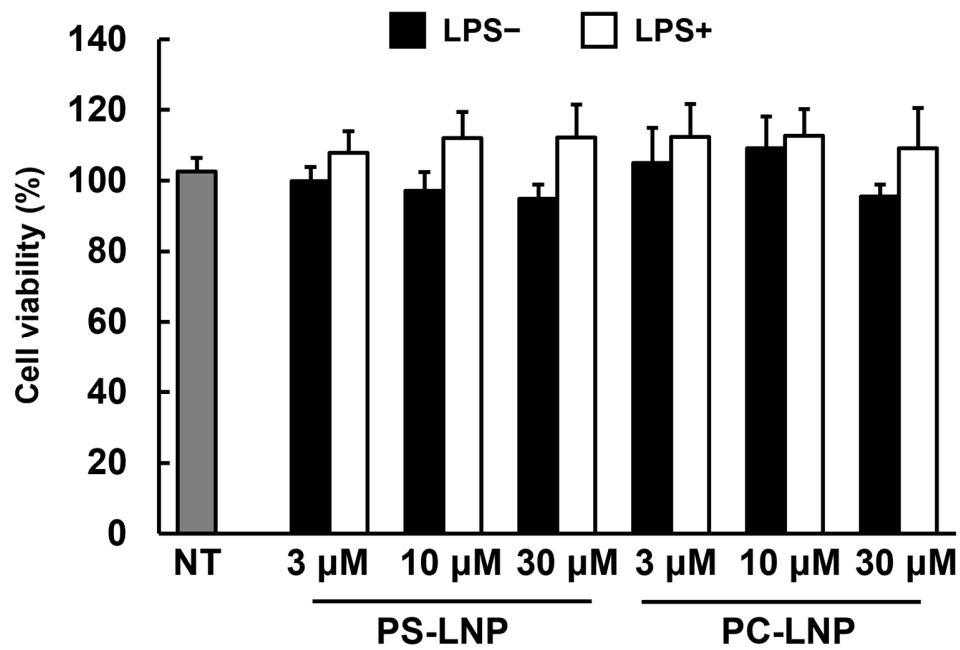

**Figure S2.** The effect of PS- and PC-LNP on cell viability. Raw cells were incubated with PS- or PC-LNP at indicated lipid concentration in the absence or presence of 100 ng/mL LPS at indicated lipid dosages. Cell viabilities were measured by WST-8 assay 24 hr after the addition of LNPs and LPS. Samples were set as quadruplicate.

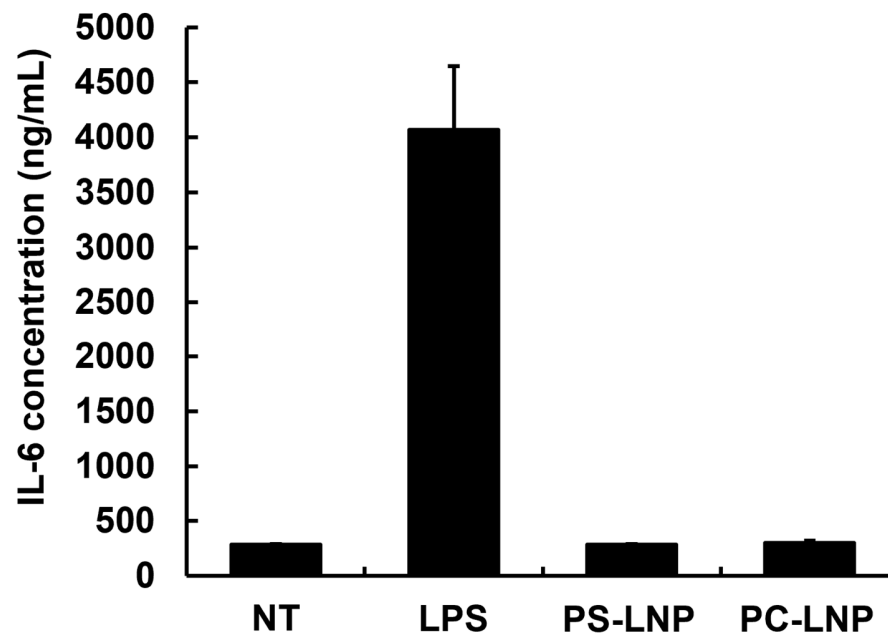

**Figure S3.** IL-6 production by PS- or PC-LNP in the absence of LPS. IL-6 production by PS- or PC-LNP was measured by ELISA 24 hr after the addition of LNPs at 30  $\mu$ M as a lipid dosage without 100 ng/mL LPS.

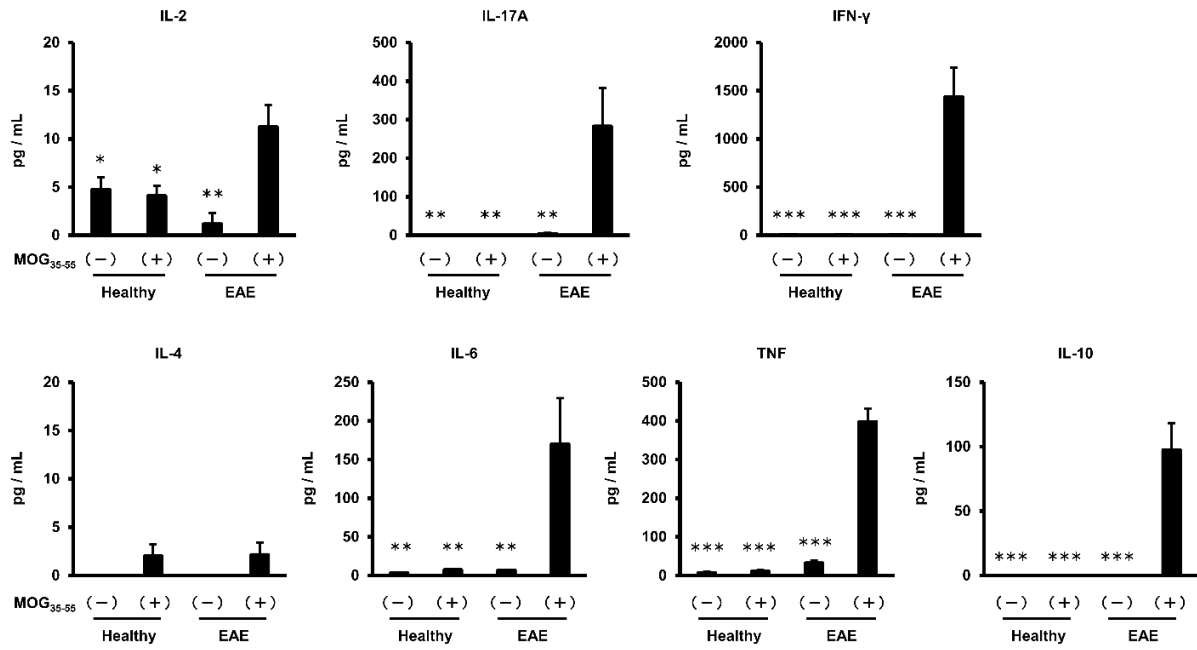

**Figure S4.** MOG<sub>35-55</sub>-responsive cytokine production by splenocytes. The splenocytes from EAE mice or health control mice were incubated with or without MOG<sub>35-55</sub>. Data represent the mean with S.E (n = 5). One-way ANOVA followed by Tukey's HSD test was performed. \*: p < 0.05; \*\*: p < 0.01; \*\*\*: p < 0.001 vs the splenocytes from EAE mice that had been restimulated with MOG<sub>35-55</sub>.



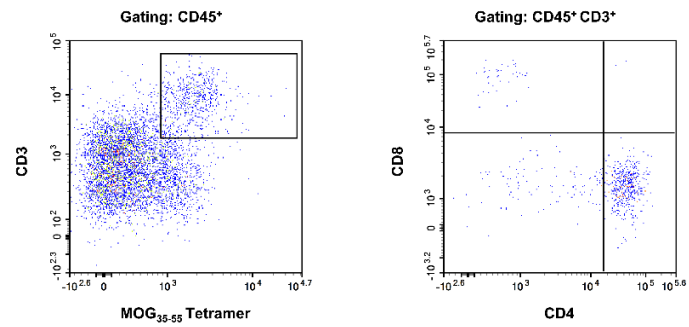

**Figure S5.** Gating strategy of cells from the brain. Left panel: identification of MOG<sub>35-55</sub>-reactive T cells. Right panel: CD4<sup>+</sup> / CD8<sup>+</sup> separation of brain-infiltrating T cells.

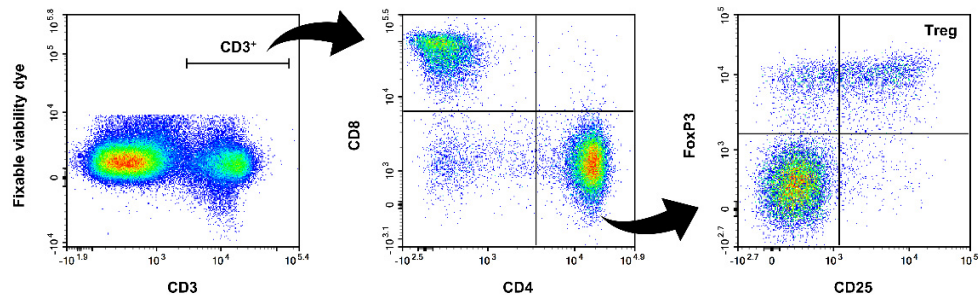

**Figure S6.** Gating strategy of splenocytes. Treg was identified as CD3<sup>+</sup>CD4<sup>+</sup>CD25<sup>+</sup>FoxP3<sup>+</sup> (shown in the right panel).

| Sample | Z-average (nm) | PdI         | Zeta-potential (mV) | RR (%)     | EE (%)     |
|--------|----------------|-------------|---------------------|------------|------------|
| PC-LNP | 151.4 ± 7.5    | 0.05 ± 0.02 | -8.8 ± 1.0          | 76.9 ± 0.8 | 92.0 ± 5.4 |
| PS-LNP | 154.0 ± 3.5    | 0.07 ± 0.01 | -24.6 ± 1.1         | 58.1 ± 2.8 | 62.0 ± 2.8 |

**Table S1.** The characteristics of the LNPs that were prepared by NanoAssemblr.

| Antibody              | Clone   | Manufacturer | RRID                                                       |
|-----------------------|---------|--------------|------------------------------------------------------------|
| AF488 anti-CD45       | 30-F11  | BioLegend    | (BioLegend Cat# 103121, RRID:AB_493532)                    |
| APC anti-CD25         | PC61    | BioLegend    | (BioLegend Cat# 102011, RRID:AB_312860)                    |
| BV421 anti-CD3        | 17A2    | BioLegend    | (BioLegend Cat# 100227, RRID:AB_10900227)                  |
| BV605 anti-CD4        | GK1.5   | BioLegend    | (BioLegend Cat# 100451, RRID:AB_2564591)                   |
| PE anti-FoxP3         | FJK-16s | eBioscience  | (Thermo Fisher Scientific Cat# 12-5773-82, RRID:AB_465936) |
| PE/Cy7 anti-CD8a      | 53-6.7  | BioLegend    | (BioLegend Cat# 100721, RRID:AB_312760)                    |
| Purified anti-CD16/32 | 93      | BioLegend    | (BioLegend Cat# 101301, RRID:AB_312800)                    |

**Table S2.** Antibodies used for flow cytometry.
